# Supplementary material
Source: PubMed Central journal article supplement (PMC5397343)

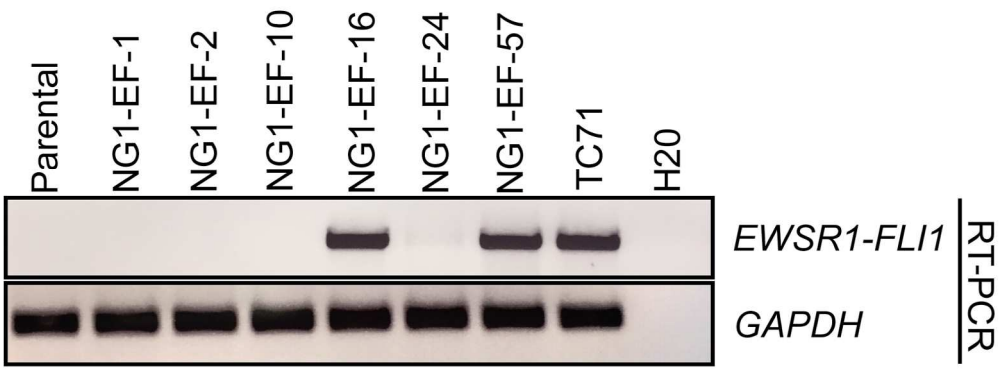

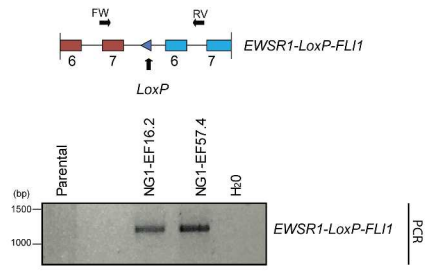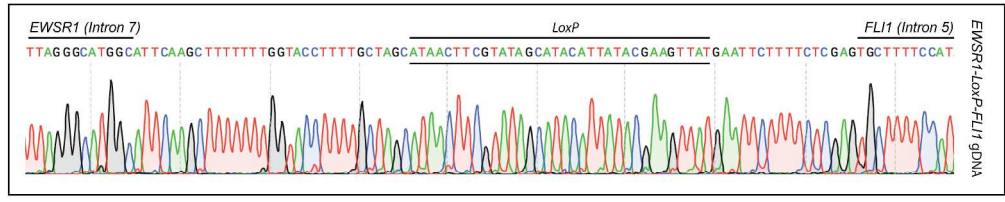

*EWSR1-FLI1*

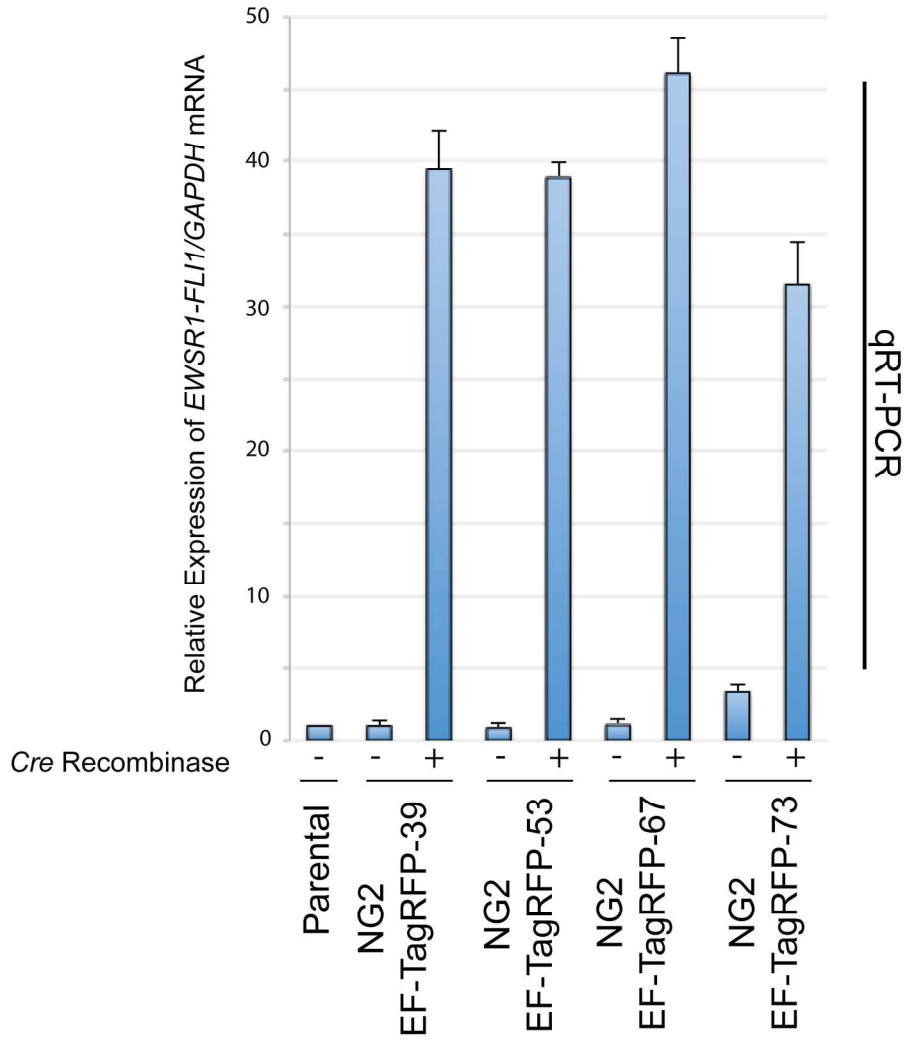

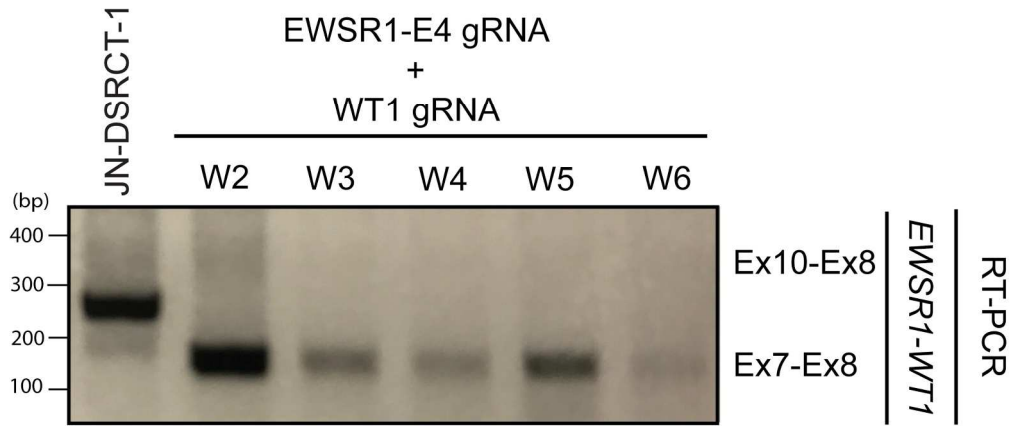

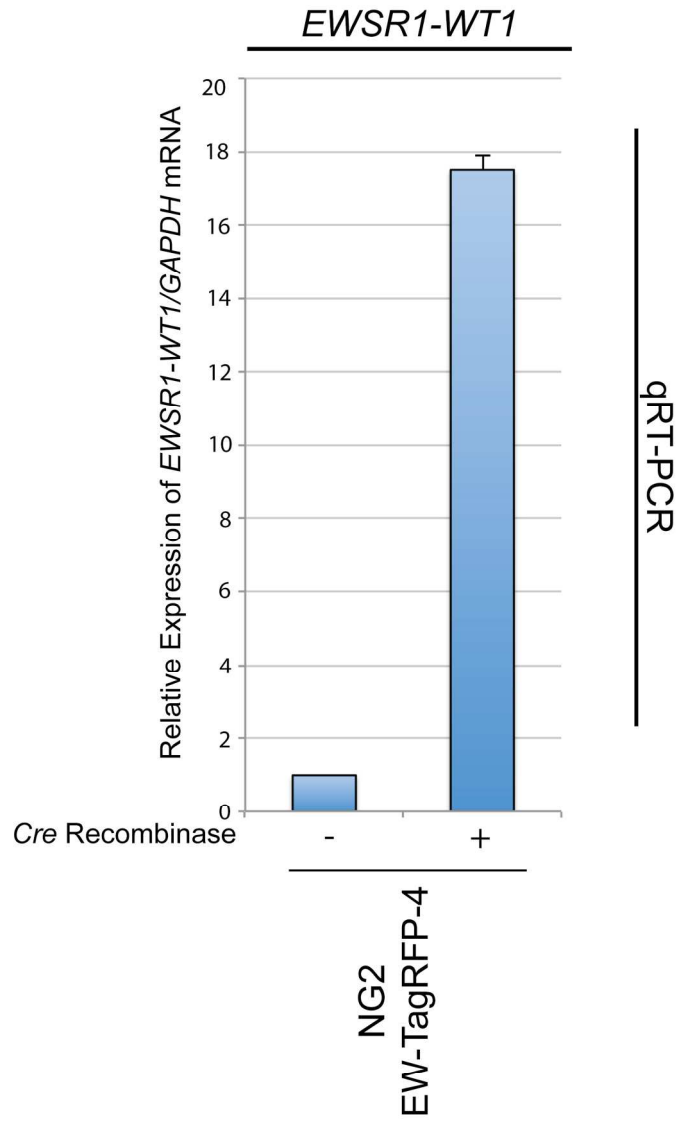

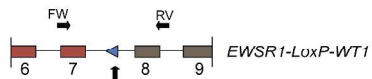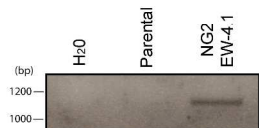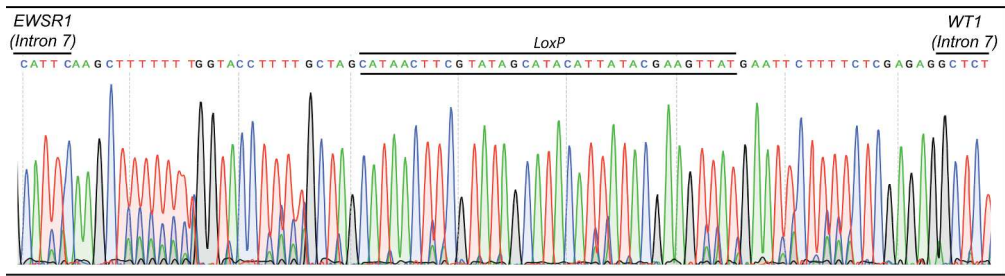

Supplement: NIHMS851974-supplement-Supp_Fig_S1-S7.pdf [file NIHMS851974-supplement-Supp_Fig_S1-S7.pdf]
